# Supplementary material for: Guardians of the Genome: Iron-Sulfur Proteins in the Nucleus
Source: Preprints.org preprint supplement (doi:10.20944/preprints202410.2446.v1), 2024-10-30
Supplement: Supplementary file 1 [file supplementary]

## Sheet: Supplementary Table 1
Supplementary Table 1. Extended version of the inventory of Fe-S cluster binding proteins that localize to the nucleus of mammalian cells. The numbering of the residues implicated in cluster binding corresponds to the human proteins. The localization of the proteins reported here is based on consolidating information from references (when available) and from three different databases: The Human P…
Name	Participates in	Fe-S bound as	Uniprot link	Protein atlas link	Localization (from Protein Atlas)	Localization (from Uniprot)	Localization (from Compartments)	Consolidated Localization	Reference for Localization	Protein Name	Other Names	C-terminal W/F?	Numer of clusters	Fe-S cluster type	Cluster binding residues	References about clusters		Comments
PRIM2	DNA replication/repair	Cofactor	P49643	https://www.proteinatlas.org/ENSG00000146143-PRIM2	Nucleoplasm	Nucleoplasm	Nucleoplasm	Nucleus		DNA primase large subunit	PRI2	Adaptor PRIM1 (F)	1	[4Fe-4S] (Cys)4	C287, C367, C384, C424	https://doi.org/10.1038/nsmb1288	https://doi.org/10.1074/jbc.M705826200
POLA1		Cofactor	P09884	https://www.proteinatlas.org/ENSG00000101868-POLA1	Nucleoplasm, Cytosol	Nucleus, Cytosol	Nucleus, Cytosol	Nucleus, Cytosol	https://doi.org/10.1038/ni.3409	DNA polymerase alpha catalytic subunit	DPOLA		1	[4Fe-4S] (Cys)4	C1283, C1286, C1310, C1315	https://doi.org/10.1038/nchembio.721
POLD1		Cofactor	P28340	https://www.proteinatlas.org/ENSG00000062822-POLD1	Nucleoplasm, Cytosol	Nucleus	Nucleus, Cytosol	Nucleus, Cytosol	https://doi.org/10.4161/cc.21280	DNA polymerase delta catalytic subunit	DPOD1	YES (W)	1	[4Fe-4S] (Cys)4	C1058, C1061, C1071, C1076	https://doi.org/10.1038/nchembio.721
POLE		Cofactor	Q07864	https://www.proteinatlas.org/ENSG00000177084-POLE	Nucleoplasm	Nucleus	Nucleus	Nucleus		DNA polymerase epsilon catalytic subunit	DPOE1		1	[4Fe-4S] (Cys)4	C651, C654, C663, C747	https://doi.org/10.1038/nchembio.721	https://doi.org/10.1038/s41594-024-01370-y	Cluster located at CysX motif instead of location originally described and reported in Uniprot (here we report the CysX residues from most recent data)
REV3L		Cofactor	O60673	https://www.proteinatlas.org/ENSG00000009413-REV3L	Nucleoplasm	Nucleus	Nucleus	Nucleus, Cytosol	https://doi.org/10.3390/ijms20010100	DNA polymerase zeta catalytic subunit	POLZ, REV3	YES (F)	1	[4Fe-4S] (Cys)4	C3086, C3089, C3099, C3104	https://doi.org/10.1038/nchembio.721
FANCJ		Cofactor	Q9BX63	https://www.proteinatlas.org/ENSG00000136492-BRIP1	Nucleoplasm, Nuclear membrane	Nucleus, Cytosol	Nucleus, Cytosol	Nucleus, Cytosol	https://doi.org/10.1016/S0092-8674(01)00304-X	Fanconi anemia group J protein	BRIP1, BACH1		1	[4Fe-4S] (Cys)4	C283, C298, C310, C350	https://doi.org/10.1182/blood-2009-11-256016	https://doi.org/10.1016/j.molcel.2006.07.019
DDX11		Cofactor	Q96FC9	https://www.proteinatlas.org/ENSG00000013573-DDX11	Nucleoplasm, Nucleoli	Nucleus, Nucleolus, Cytosol	Nucleoplasm, Spindle	Nucleus	https://doi.org/10.1242/jcs.03262	ATP-dependent DEAD/H-box DNA helicase 11	ChlR1		1	[4Fe-4S] (Cys)4	C267, C285, C315, C350	https://doi.org/10.26508/lsa.201900547
RTEL1		Cofactor	Q9NZ71	https://www.proteinatlas.org/ENSG00000258366-RTEL1	Nucleoplasm, Nuclear speckles, Nuclear membrane	Nucleus	Nucleus	Nucleus	https://doi.org/10.1074/jbc.M112.416602	Regulator of telomere elongation helicase 1	RTEL		1	[4Fe-4S] (Cys)4	C145, C163, C172, C207	https://doi.org/10.1155/2014/285791
XPD		Cofactor	P18074	https://www.proteinatlas.org/ENSG00000104884-ERCC2	Nucleoplasm, Cytosol	Nucleus, Cytosol	Nucleus, Cytosol	Nucleus, Cytosol	https://doi.org/10.1016/j.molcel.2010.07.029	General transcription and DNA repair factor IIH helicase subunit XPD	ERCC2, XPDC		1	[4Fe-4S] (Cys)4	C116, C134, C155, C190	https://doi.org/10.1016/j.molcel.2006.07.019
DNA2		Cofactor	P51530	https://www.proteinatlas.org/ENSG00000138346-DNA2	Mitochondria, Nucleus	Mitochondria, Nucleus	Nucleus, Mitochondria	Nucleus, Mitochondria	https://doi.org/10.1128/MCB.01834-08	DNA replication helicase/nuclease 2	DNA2L		1	[4Fe-4S] (Cys)4	C136, C393, C396, C402	https://doi.org/10.1093/nar/gks534	https://doi.org/10.1038/s42003-020-1048-4
EXO5		Cofactor	Q9H790	https://www.proteinatlas.org/ENSG00000164002-EXO5	Nucleoplasm, Cytosol	Nucleus, Cytosol	Nucleus, Cytosol	Nucleus, Cytosol	https://doi.org/10.1074/jbc.M112.422444	Exonuclease 5	DEM1		1	[4Fe-4S] (Cys)4	C92, C343, C346, C352	https://doi.org/10.1074/jbc.M112.422444
MUTYH		Cofactor	Q9UIF7	https://www.proteinatlas.org/ENSG00000132781-MUTYH	Nucleoplasm	Mitochondria, Nucleus	Nucleus, Mitochondria	Nucleus, Mitochondria	https://doi.org/10.1002/humu.22794	MutY Adenine DNA glycosylase	MYH		1	[4Fe-4S] (Cys)4	C287, C294, C297, C303	https://doi.org/10.1006/abbi.2000.1890	https://doi.org/10.1016/bs.mie.2017.11.035
NTHL1		Cofactor	P78549	https://www.proteinatlas.org/ENSG00000065057-NTHL1	Nucleus	Mitochondria, Nucleus	Nucleus, Mitochondria	Nucleus, Mitochondria	https://doi.org/10.1016/S1568-7864(02)00145-3	Nth like DNA glycosylase 1	NTH1, OCTS3		1	[4Fe-4S] (Cys)4	C290, C297, C300, C306	https://doi.org/10.1126/science.1411536	https://doi.org/10.1093/nar/gkab1162
ELP3	RNA transactions	Cofactor	Q9H9T3	https://www.proteinatlas.org/ENSG00000134014-ELP3	Cytosol	Nucleus, Cytosol	Nucleus, Cytosol	Nucleus, Cytosol	https://doi.org/10.1073/pnas.251672198	Elongator complex protein 3		Adaptor ELP4 (F)	1	[4Fe-4S] (Cys)3 SAM	C99, C109, C112	https://doi.org/10.1111/j.1365-2958.2005.04989.x	https://doi.org/10.1016/j.bbamcr.2014.12.010
RPC6		Cofactor	Q9H1D9	https://www.proteinatlas.org/ENSG00000132664-POLR3F	Nucleoplasm	Nucleus	Nucleus, Cytosol	Nucleus	https://doi.org/10.1038/s41467-020-20262-5	DNA-directed RNA polymerase III subunit RPC6	POLR3F	YES (F)	1	[4Fe-4S] (Cys)4	C287, C290, C296, C307	https://doi.org/10.7554/eLife.08378	https://doi.org/10.1038/s41422-021-00472-2
CPSF4		Cofactor	O95639	https://www.proteinatlas.org/ENSG00000160917-CPSF4	Nucleoplasm	Nucleus	Nucleus	Nucleus	https://doi.org/10.1016/j.molonc.2014.02.001	Cleavage and polyadenylation specific factor 4	CPSF30, NAR, NEB1		1	[2Fe-2S] (Cys)3 (His)?	Unknown	https://doi.org/10.1073/pnas.1517620113	https://doi.org/10.1021/acs.biochem.9b01065	Fe-S cluster is coordinated by one of the five CCCH ‘zinc finger’ domains, but it is unknown which one
TYW1		Cofactor	Q9NV66	https://www.proteinatlas.org/ENSG00000198874-TYW1	Nucleoplasm, Nucleoli, Nucleoli rim	Unknown	Nucleus, Cytosol	Nucleus, Cytosol		tRNA 4-demethylwyosine synthase TYW1	RSAFD1		1	[4Fe-4S] (Cys)3 SAM	C416, C420, C423	https://doi.org/10.1016/bs.mie.2018.04.024	https://doi.org/10.1016/j.bbamcr.2014.12.010
TYW1B		Cofactor	Q6NUM6	https://www.proteinatlas.org/ENSG00000277149-TYW1B	Nucleoplasm, Nucleoli, Nucleoli rim	Unknown	Unknown	Nucleus		tRNA 4-demethylwyosine synthase TYW1 homolog B	RSAFD2		1	[4Fe-4S] (Cys)3 SAM	C352, C356, C359	https://doi.org/10.1016/bs.mie.2018.04.024	https://doi.org/10.1016/j.bbamcr.2014.12.010
CDK5RAP1		Cofactor	Q96SZ6	https://www.proteinatlas.org/ENSG00000101391-CDK5RAP1	Mitochondria, Nucleoplasm, Cytosol	Nucleus, Mitochondria	Mitochondria, Nucleus, Cytosol	Nucleus, Mitochondria, Cytosol	https://doi.org/10.1093/nar/gks240	tRNA methylthiotransferase	MIAB		2	[4Fe-4S] (Cys)4, [4Fe-4S] (Cys)3 SAM	C109, C145, C183, C258, C262, C265	https://doi.org/10.1074/jbc.M408562200	https://doi.org/10.1016/j.bbamcr.2014.12.010
KIF4A	Mitosis	Cofactor	O95239	https://www.proteinatlas.org/ENSG00000090889-KIF4A	Nucleoplasm, Midbody	Nucleus, Spindle	Nucleus, Cytosol, Spindle	Nucleus	https://doi.org/10.1042/bj3600549	Chromosome-associated kinesin KIF4A	KIF4		1	[4Fe-4S] (Cys)4?	Unknown	https://doi.org/10.1242/jcs.211433		Fe-S cluster is coordinated at the C-terminal Cys-rich domain containing nine conserved Cys residues, but it is unknown which ones provide the ligands for the cluster
KIF4B		Cofactor	Q2VIQ3	https://www.proteinatlas.org/ENSG00000226650-KIF4B	Nucleoplasm, Midbody	Nucleus, Spindle	Nucleus, Cytosol	Nucleus	https://doi.org/10.1042/bj3600549	Chromosome-associated kinesin KIF4B			1	[4Fe-4S] (Cys)4?	Unknown	https://doi.org/10.1242/jcs.211433		Fe-S cluster is coordinated at the C-terminal Cys-rich domain containing nine conserved Cys residues, but it is unknown which ones provide the ligands for the cluster
NCOA4	Iron metabolism	Sensor	Q13772	https://www.proteinatlas.org/ENSG00000266412-NCOA4	Nucleoplasm, Nucleoli, Cytosol, Golgi	Nucleus, Cytosol	Nucleus	Nucleus, Cytosol	https://doi.org/10.1016/j.molcel.2014.04.031	Nuclear receptor coactivator 4	ARA70, ELE1, RFG		1	[3Fe-4S] (Cys)4?	C404, C410, C416, C422	https://doi.org/10.1016/j.jbc.2023.104701	https://doi.org/10.1016/j.jbc.2023.105612	Four Cys seem to be necessary for binding the cluster but only 3 iron atoms are present in the 3Fe-4S cluster
FBXL5		Sensor	Q9UKA1	https://www.proteinatlas.org/ENSG00000118564-FBXL5	Not available	Nucleus, Perinuclear region	Perinuclear region, Nucleus, Cytosol	Nucleus, Perinuclear region	https://doi.org/10.1093/nar/gkt935	F-box/LRR-repeat protein 5 (degradation of IRP2)	FBL4, FBL5, FLR1		1	[2Fe-2S] (Cys)4	C662, C676, C686, C687	https://doi.org/10.1016/j.molcel.2020.02.011
DPH1	Post-translational modifications	Cofactor	Q9BZG8	https://www.proteinatlas.org/ENSG00000108963-DPH1	Nucleoplasm	Nucleus, Cytosol	Nucleus, Cytosol	Nucleus, Cytosol	https://pubmed.ncbi.nlm.nih.gov/10519411/	Diphthamide synthase subunit 1	DPH2L, DPH2L1, OVCA1		1	[4Fe-4S] (Cys)3 SAM	C110, C214, C342	https://doi.org/10.1038/nature09138
DPH2		Cofactor	Q9BQC3	https://www.proteinatlas.org/ENSG00000132768-DPH2	Nucleoplasm	Nucleus, Cytosol	Cytosol	Nucleus, Cytosol		Diphthamide synthase subunit 2	DPH2L2		1	[4Fe-4S] (Cys)3 SAM	C89, C110, C341	https://doi.org/10.1038/nature09138
ATE1		Cofactor	O95260	https://www.proteinatlas.org/ENSG00000107669-ATE1	Nucleoplasm	Nucleus, Cytosol	Nucleus, Cytosol	Nucleus, Cytosol	https://doi.org/10.1128/MCB.19.1.182	Arginyl tRNA protein transferase 1			1	[4Fe-4S] (Cys)4	C23, C26, C71, C72	https://doi.org/10.1038/s41467-023-36158-z
SDHB	Mitochondrial function	Cofactor	P21912	https://www.proteinatlas.org/ENSG00000117118-SDHB	Mitochondria, Nucleoplasm	Mitochondria	Mitochondria, Nucleus	Mitochondria, Nucleus	https://doi.org/10.1073/pnas.2216713120	Succinate dehydrogenase complex iron sulfur subunit B	SDH, SDH1		3	[2Fe-2S] (Cys)4, [3Fe-4S] (Cys)3, [4Fe-4S] (Cys)4	C93, C98, C101, C113, C186, C189, C192, C196, C243, C249, C253	https://doi.org/10.1073/pnas.2216713120
RFESD	Unknown	Cofactor	Q8TAC1	https://www.proteinatlas.org/ENSG00000175449-RFESD	Nucleoplasm	Unknown	Nucleus	Nucleus		Rieske Fe-S domain containing protein			1	[2Fe-2S] (Cys)2 (His)2	C57, H59, C80, H83	Predicted
CIAPIN1	CIA	CIA	Q6FI81	https://www.proteinatlas.org/ENSG00000005194-CIAPIN1	Mitochondria, Nucleoplasm	Cytosol, Nucleus, Mitochondria	Nucleus, Mitochondria, Cytosol	Nucleus, Mitochondria, Cytosol	https://doi.org/10.1369/jhc.6A6960.2006	Anamorsin	Anamorsin, CPIN1		2	[2Fe-2S] (Cys)4, [4Fe-4S] (Cys)4?	C237, C246, C249, C251, C274, C277, C285, C288	https://doi.org/10.1016/j.chembiol.2011.03.015	https://doi.org/10.1093/jb/mvw054	There is some controversy about the number and type of cluster bound by CIAPIN1
BOLA2		CIA	Q9H3K6	https://www.proteinatlas.org/ENSG00000183336-BOLA2	Not available	Nucleus, Cytosol	Nucleus, Cytosol	Nucleus, Cytosol	https://doi.org/10.1089/ars.2011.4253	BolA-like protein 2	BOLA2A		1*	[2Fe-2S]* Ligands shared with GLRX3	C31, H68	https://doi.org/10.1021/bi2019089	https://doi.org/10.1074/jbc.M116.744946	Ligand shared with GLRX3
GLRX3		CIA	O76003	https://www.proteinatlas.org/ENSG00000108010-GLRX3	Not available	Cytosol	Nucleus, Cytosol	Nucleus, Cytosol	https://doi.org/10.1016/j.cellsig.2019.06.005	Glutaredoxin 3	PICOT, TXNL2, GRX3		1*	[2Fe-2S]* Ligands shared with BOLA2	C159, C261	https://doi.org/10.1021/bi2019089	https://doi.org/10.1074/jbc.M116.744946	Ligand shared with BOLA2 and dimeric partners
NUBP2		CIA	Q9Y5Y2	https://www.proteinatlas.org/ENSG00000095906-NUBP2	Nucleoplasm, Cytosol	Nucleus, Cytosol	Nucleus, Cytosol	Nucleus, Cytosol	https://doi.org/10.1007/s11033-009-9477-7	NUBP iron-sulfur cluster assembly factor 2	CFD1		2*	[4Fe-4S]* Ligands shared with NUBP1	C196, C199	https://doi.org/10.1038/nchembio872	https://doi.org/10.1128/MCB.00545-08	Contains two stable clusters in the N-termini of NUBP1 and two labile, bridging clusters between subunits of the NUBP1-NUBP2 heterotetramer
NFU1	ISC	ISC	Q9UMS0	https://www.proteinatlas.org/ENSG00000169599-NFU1	Cytosol, Nucleoplasm	Mitochondria, Cytosol	Nucleus, Mitochondria, Cytosol	Nucleus, Mitochondria, Cytosol	https://doi.org/10.1073/pnas.1732541100	NFU1 iron-sulfur cluster scaffold	HIRIP5		1*	[4Fe-4S]* Ligands shared between dimers	C210, C213	https://doi.org/10.1073/pnas.1732541100	https://doi.org/10.1016/j.str.2016.08.020	Ligand shared between tetrameric dimeric partners. Isoform I is localized in the mitochondria, whereas isoform II is present in the cytosol and the nucleus.
NFS1		ISC	Q9Y697	https://www.proteinatlas.org/ENSG00000244005-NFS1	Cytosol, Nucleoplasm	Cytosol, Nucleus, Mitochondria	Nucleus, Mitochondria, Cytosol	Nucleus, Mitochondria, Cytosol	https://doi.org/10.1016/S1097-2765(00)80295-6	NFS1 cysteine desulfurase	NIFS		1*	[2Fe-2S]* Ligands shared with ISCU	C381	https://doi.org/10.1038/s41467-019-09989-y	https://doi.org/10.1074/jbc.M804064200	Ligand shared with ISCU via persulfide group
GLRX2		ISC	Q9NS18	https://www.proteinatlas.org/ENSG00000023572-GLRX2	Mitochondria, Nucleoplasm	Mitochondria, Nucleus	Mitochondria, Nucleus	Nucleus, Mitochondria	https://doi.org/10.1074/jbc.M011605200	Glutaredoxin 2	GRX2		1*	[2Fe-2S]* Ligands shared between dimers	C68, C153	https://doi.org/10.1073/pnas.0500735102		Ligand shared between dimeric partners

## Sheet: Table 1
Participates in	Name	Consolidated Localization	Reference for Localization	Fe-S cluster type	Cluster binding residues
DNA replication DNA repair	PRIM2	Nucleus		[4Fe-4S] (Cys)4	C287, C367, C384, C424
	POLA1	Nucleus, Cytosol	https://doi.org/10.1038/ni.3409	[4Fe-4S] (Cys)4	C1283, C1286, C1310, C1315
	POLD1	Nucleus, Cytosol	https://doi.org/10.4161/cc.21280	[4Fe-4S] (Cys)4	C1058, C1061, C1071, C1076
	POLE	Nucleus		[4Fe-4S] (Cys)4	C651, C654, C663, C747
	REV3L	Nucleus, Cytosol	https://doi.org/10.3390/ijms20010100	[4Fe-4S] (Cys)4	C3086, C3089, C3099, C3104
	FANCJ	Nucleus, Cytosol	https://doi.org/10.1016/S0092-8674(01)00304-X	[4Fe-4S] (Cys)4	C283, C298, C310, C350
	DDX11	Nucleus	https://doi.org/10.1242/jcs.03262	[4Fe-4S] (Cys)4	C267, C285, C315, C350
	RTEL1	Nucleus	https://doi.org/10.1074/jbc.M112.416602	[4Fe-4S] (Cys)4	C145, C163, C172, C207
	XPD	Nucleus, Cytosol	https://doi.org/10.1016/j.molcel.2010.07.029	[4Fe-4S] (Cys)4	C116, C134, C155, C190
	DNA2	Nucleus, Mitochondria	https://doi.org/10.1128/MCB.01834-08	[4Fe-4S] (Cys)4	C136, C393, C396, C402
	EXO5	Nucleus, Cytosol	https://doi.org/10.1074/jbc.M112.422444	[4Fe-4S] (Cys)4	C92, C343, C346, C352
	MUTYH	Nucleus, Mitochondria	https://doi.org/10.1002/humu.22794	[4Fe-4S] (Cys)4	C287, C294, C297, C303
	NTHL1	Nucleus, Mitochondria	https://doi.org/10.1016/S1568-7864(02)00145-3	[4Fe-4S] (Cys)4	C290, C297, C300, C306
RNA transactions	ELP3	Nucleus, Cytosol	https://doi.org/10.1073/pnas.251672198	[4Fe-4S] (Cys)3 SAM	C99, C109, C112
	RPC6	Nucleus	https://doi.org/10.1038/s41467-020-20262-5	[4Fe-4S] (Cys)4	C287, C290, C296, C307
	CPSF4	Nucleus	https://doi.org/10.1016/j.molonc.2014.02.001	[2Fe-2S] (Cys)3 (His)?	Unknown
	TYW1	Nucleus		[4Fe-4S] (Cys)3 SAM	C416, C420, C423
	TYW1B	Nucleus		[4Fe-4S] (Cys)3 SAM	C352, C356, C359
	CDK5RAP1	Nucleus, Mitochondria, Cytosol	https://doi.org/10.1093/nar/gks240	[4Fe-4S] (Cys)4, [4Fe-4S] (Cys)3 SAM	C109, C145, C183, C258, C262, C265
Mitosis	KIF4A	Nucleus	https://doi.org/10.1042/bj3600549	[4Fe-4S] (Cys)4?	Unknown
	KIF4B	Nucleus	https://doi.org/10.1042/bj3600549	[4Fe-4S] (Cys)4?	Unknown
Iron metabolism	NCOA4	Nucleus, Cytosol	https://doi.org/10.1016/j.molcel.2014.04.031	[3Fe-4S] (Cys)4?	C404, C410, C416, C422
	FBXL5	Nucleus, Perinuclear region	https://doi.org/10.1093/nar/gkt935	[2Fe-2S] (Cys)4	C662, C676, C686, C687
Post-translational modifications	DPH1	Nucleus, Cytosol	https://pubmed.ncbi.nlm.nih.gov/10519411/	[4Fe-4S] (Cys)3 SAM	C110, C214, C342
	DPH2	Nucleus, Cytosol		[4Fe-4S] (Cys)3 SAM	C89, C110, C341
	ATE1	Nucleus, Cytosol	https://doi.org/10.1128/MCB.19.1.182	[4Fe-4S] (Cys)4	C23, C26, C71, C72
Respiration	SDHB	Mitochondria, Nucleus	https://doi.org/10.1073/pnas.2216713120	[2Fe-2S] (Cys)4, [3Fe-4S] (Cys)3, [4Fe-4S] (Cys)4	C93, C98, C101, C113, C186, C189, C192, C196, C243, C249, C253
Unknown	RFESD	Nucleus		[2Fe-2S] (Cys)2 (His)2	C57, H59, C80, H83
CIA	CIAPIN1	Nucleus, Mitochondria, Cytosol	https://doi.org/10.1369/jhc.6A6960.2006	[2Fe-2S] (Cys)4, [4Fe-4S] (Cys)4?	C237, C246, C249, C251, C274, C277, C285, C288
	BOLA2	Nucleus, Cytosol	https://doi.org/10.1089/ars.2011.4253	[2Fe-2S]* Ligands shared with GLRX3	C31, H68
	GLRX3	Nucleus, Cytosol	https://doi.org/10.1016/j.cellsig.2019.06.005	[2Fe-2S]* Ligands shared with BOLA2	C159, C261
	NUBP2	Nucleus, Cytosol	https://doi.org/10.1007/s11033-009-9477-7	[4Fe-4S]* Ligands shared with NUBP1	C196, C199
ISC	NFU1	Nucleus, Mitochondria, Cytosol	https://doi.org/10.1073/pnas.1732541100	[4Fe-4S]* Ligands shared between dimers	C210, C213
	NFS1	Nucleus, Mitochondria, Cytosol	https://doi.org/10.1016/S1097-2765(00)80295-6	[2Fe-2S]* Ligands shared with ISCU	C381
	GLRX2	Nucleus, Mitochondria	https://doi.org/10.1074/jbc.M011605200	[2Fe-2S]* Ligands shared between dimers	C68, C153
